# Supplementary material for: 3D hierarchical porous indium catalyst for highly efficient electroreduction of CO2
Source: Royal Society of Chemistry journal article supplement (doi:10.1039/c8ta11645h), 2019-01-01
Supplement: c8ta11645h1.pdf [file c8ta11645h1.pdf]

## Supporting information

### 3D Hierarchical Porous Indium Catalyst for Highly Efficient Electroreduction of CO<sub>2</sub>

*Wen Luo,<sup>a,b\*</sup> Wei Xie,<sup>c</sup> Mo Li,<sup>a,b</sup> Jie Zhang,<sup>a,b</sup> Andreas Züttel<sup>a,b</sup>*

a. Laboratory of Materials for Renewable Energy (LMER), Institute of Chemical Sciences and Engineering (ISIC), Basic Science Faculty (SB), École Polytechnique Fédérale de Lausanne (EPFL) Valais/Wallis, Energypolis, Rue de l'Industrie 17, CH-1951 Sion, Switzerland

b. Empa Materials Science & Technology, CH-8600 Dübendorf, Switzerland

c. INAMORI Frontier Research Center, Kyushu University, 744 Motooka, Nishiku, Fukuoka 819-0395, Japan

Corresponding author: [wen.luo@epfl.ch](mailto:wen.luo@epfl.ch)

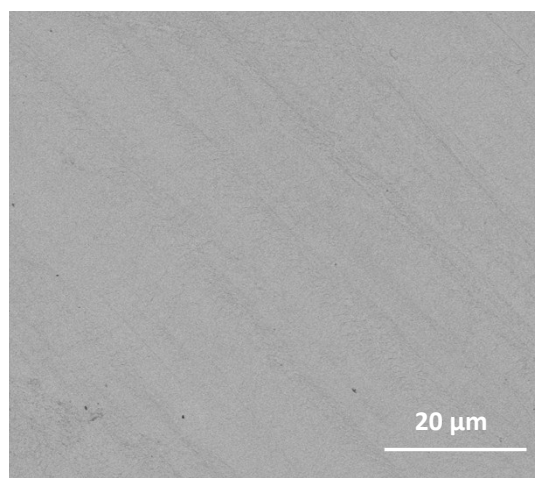

Figure S1 SEM image of the cleaned In foil sample

Table S1 Mass loading of *hp*-In, Pd-In and porous Pd samples measured by ICP-OES.

| Sample                           | <i>hp</i> -In | Pd-In-0.1 | Pd-In-0.5 | Pd-In-1.0 | Pd-In-2.0 | Porous Pd |
|----------------------------------|---------------|-----------|-----------|-----------|-----------|-----------|
| Mass of In (mg/cm <sup>2</sup> ) | 13.3          | 13.1      | 13.0      | 13.4      | 13.5      | -         |
| Mass of Pd (mg/cm <sup>2</sup> ) | -             | 1.4 E-2   | 3.1 E-2   | 5.2 E-2   | 9.9 E-2   | 1.7 E-1   |

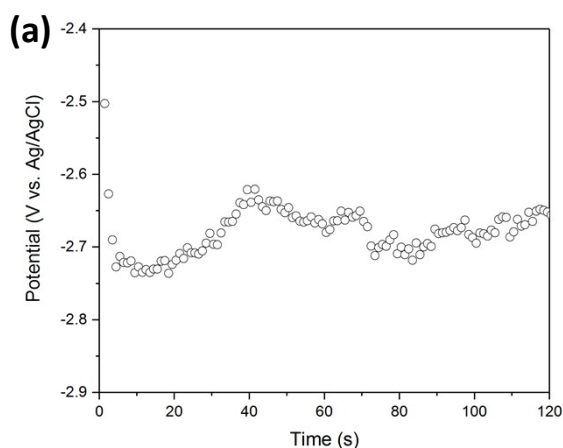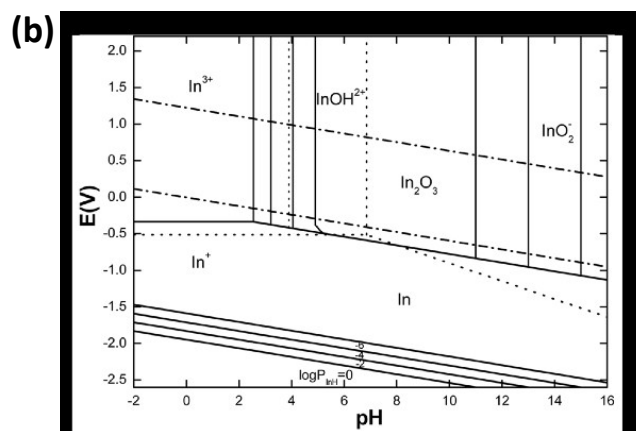

Figure S2 (a) Potential as a function of time for electrodeposition of *hp*-In. (b) Pourbaix diagram (E vs. pH diagram) for indium in water at 25 °C.<sup>1,2</sup> Figure S2 a shows that during the electrodeposition, the applied voltage was extremely low (around -2.7 V vs. Ag/AgCl, which is about -2.5 V vs. SHE). Compared with the Pourbaix diagram shown in Figure S2 b, under our deposition condition, no indium oxide or hydroxide can form.

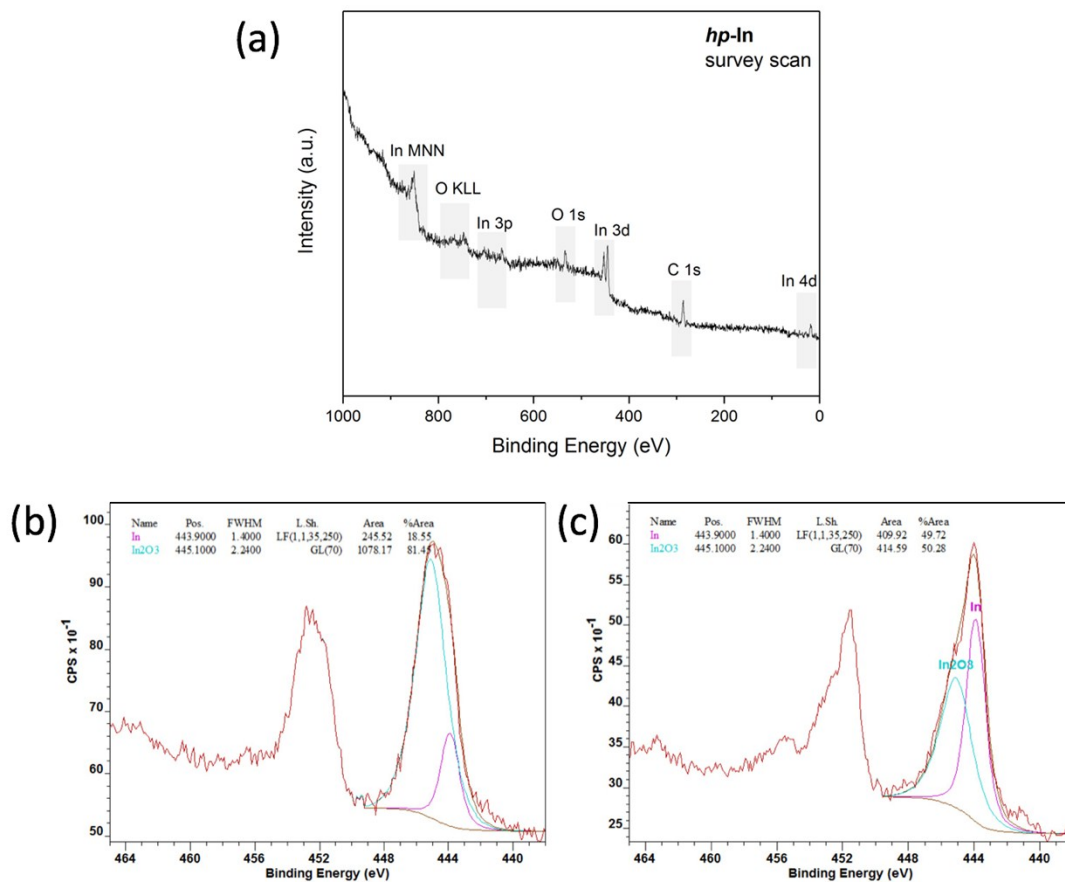

Figure S3 (a) XPS survey scan of as-prepared *hp*-In, and XPS deconvolution parameters of (b) In foil and (c) *hp*-In.

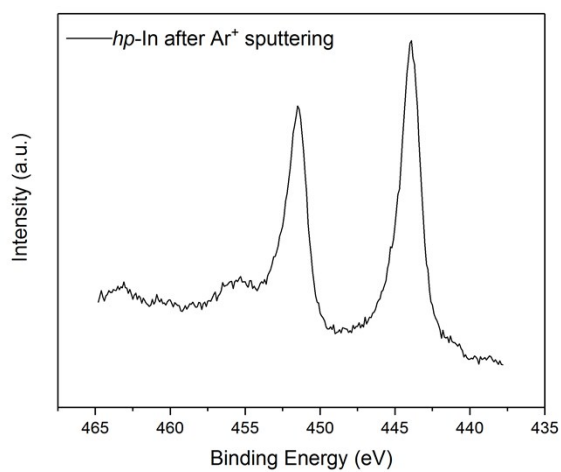

Figure S4 In 3d XP spectrum of *hp*-In after Ar<sup>+</sup> sputtering.

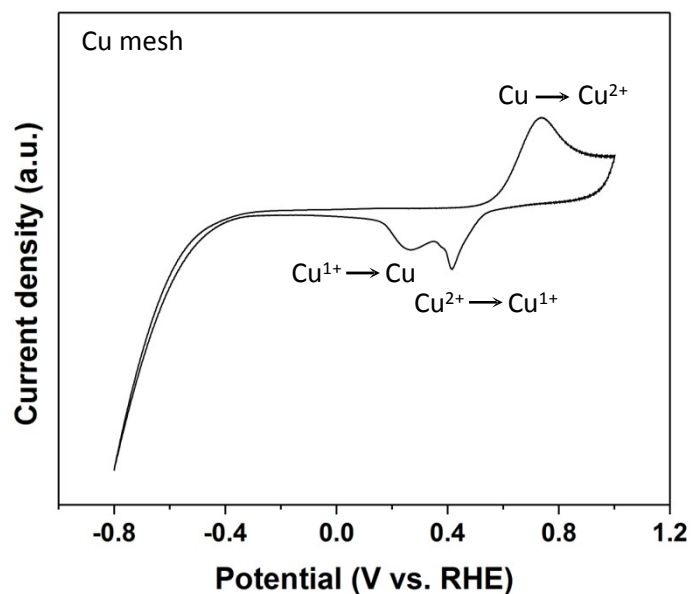

Figure S5 CV of Cu mesh performed in CO<sub>2</sub> saturated 0.1 M KHCO<sub>3</sub> (scan rate 50 mV/s). The redox peaks of Cu appear at higher potential range compared with those of In.

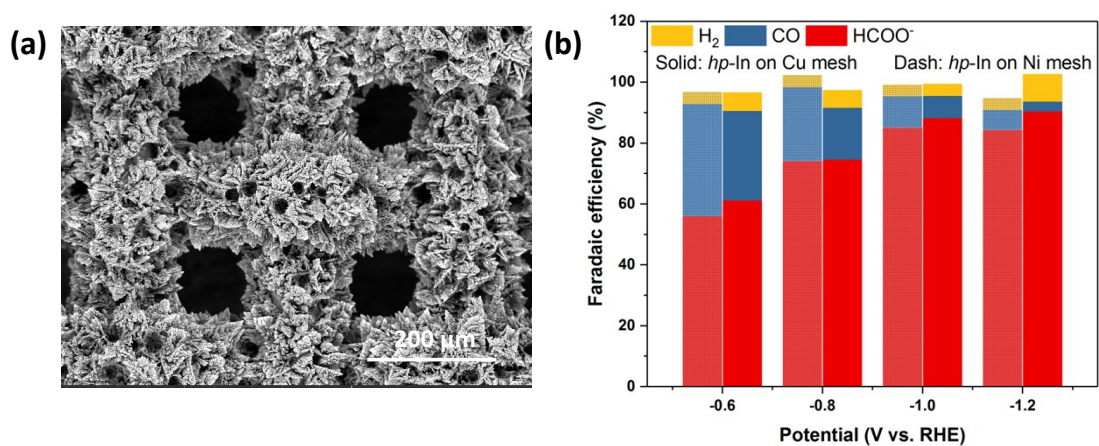

Figure S6 (a) SEM image of porous In deposited on Ni mesh. (b) Potential dependent faradaic efficiencies for *hp*-In on Cu mesh and porous In on Ni mesh.

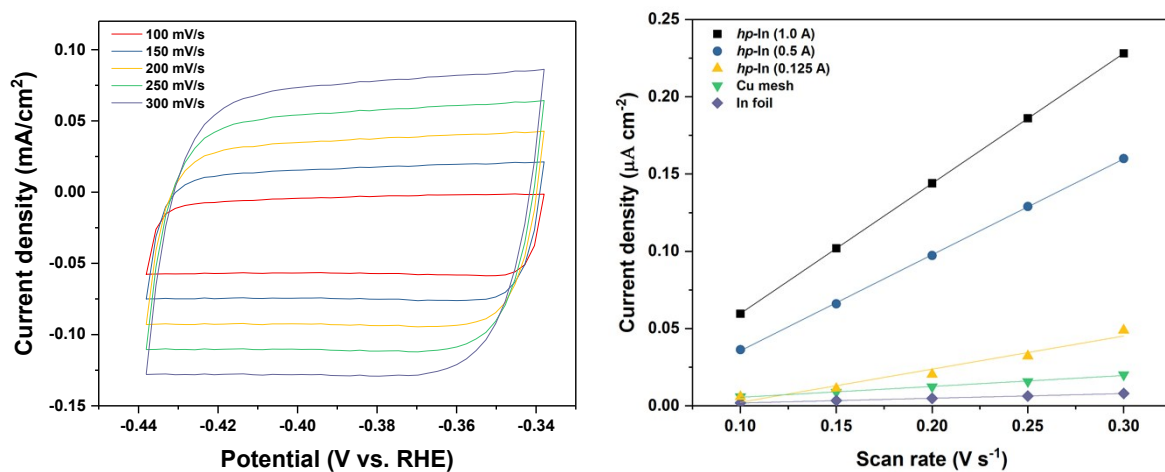

Figure S7 CVs for the *hp*-In at various scan rates (left). The linear regression of the double layer capacitance of each material obtained from the electrochemical studies (right).

Table S2 Summary of the roughness factors of the four In electrodes and the Cu mesh substrate used in this work.

| Electrode               | Capacitance | Electrochemical surface area (cm <sup>2</sup> ) |
|-------------------------|-------------|-------------------------------------------------|
| In foil                 | 30.5 μF     | 1                                               |
| Cu mesh                 | 71.0 μF     | 2                                               |
| <i>hp</i> -In (0.125 A) | 0.22 mF     | 7.1                                             |
| <i>hp</i> -In (0.5 A)   | 0.62 mF     | 20.3                                            |
| <i>hp</i> -In (1.0 A)   | 0.84 mF     | 27.6                                            |

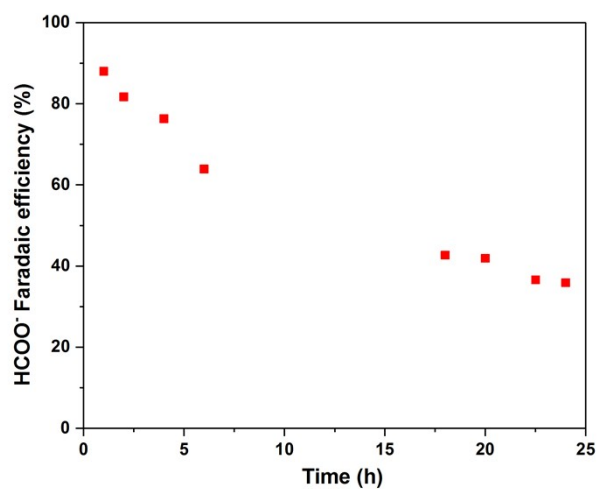

Figure S8 Stability of *hp*-In, tested without exchanging the electrolyte.

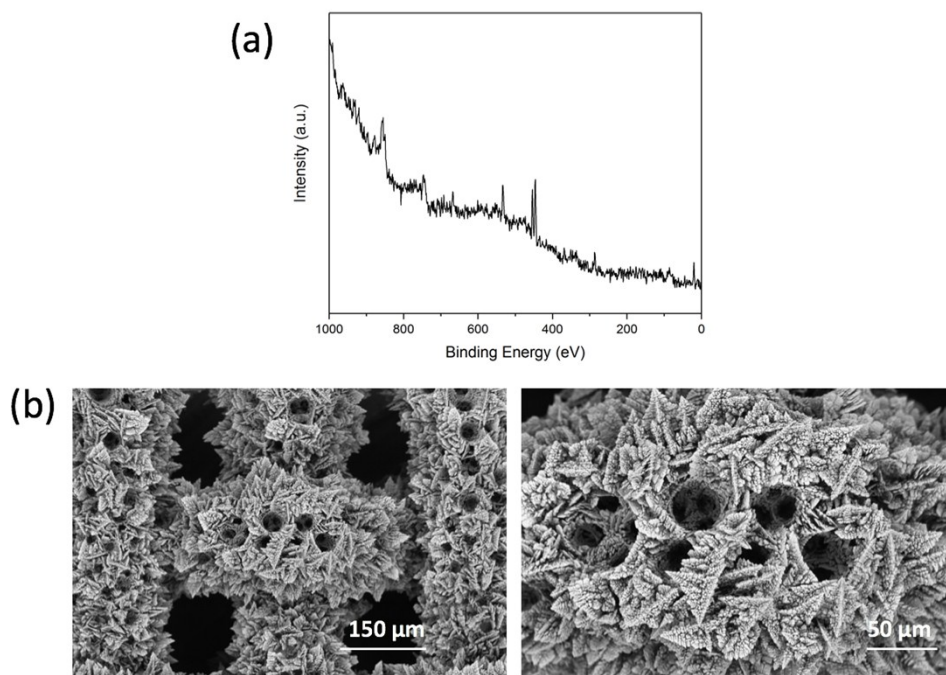

Figure S9 (a) XPS survey scan (b) SEM images of *hp*-In after 24 h stability test. No Cu from Cu mesh can be detected by XPS. SEM images show similar 3D structure as that of the fresh *hp*-In sample.

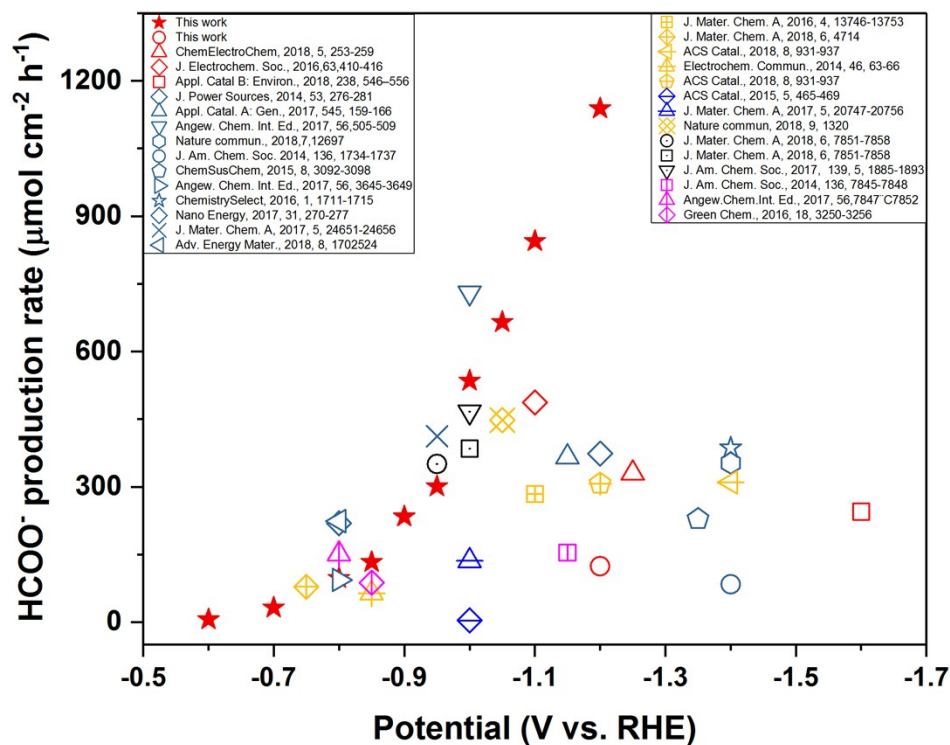

Figure S10 Formate production rate at various applied potentials on the *hp*-In electrode, along with an overview of the formate production rate on the state-of-the-art CO<sub>2</sub>-to-formate catalysts.

Table S3 Comparison of CO<sub>2</sub> reduction performance on different In-based catalysts.

| Electrode              | Electrolyte                                  | Operating potential (vs. RHE)  | Current density (mA/cm <sup>2</sup> ) | Faradaic efficiency for formate | Reference        |
|------------------------|----------------------------------------------|--------------------------------|---------------------------------------|---------------------------------|------------------|
| <b><i>hp</i>-In</b>    | <b>0.1 M KHCO<sub>3</sub></b>                | <b>-1.0 V</b><br><b>-1.2 V</b> | <b>32.5</b><br><b>67.5</b>            | <b>89.1%</b><br><b>90.4%</b>    | <b>This work</b> |
| In/C GDE               | 0.1 M Na <sub>2</sub> SO <sub>4</sub>        | -1.05 V                        | 6.3                                   | 45%                             | 3                |
| In/Graphite            | 0.05 M NaHCO <sub>3</sub>                    | -1.6 V                         | ~ 18.5 <sup>[a]</sup>                 | 94.5%                           | 4                |
| Dendritic In           | 0.5 M KHCO <sub>3</sub>                      | -0.86 V                        | 5.8                                   | 86%                             | 5                |
| Anodized In            | 0.5 M Na <sub>2</sub> SO <sub>4</sub>        | -1.2 V                         | -                                     | ~ 88% <sup>[a]</sup>            | 6                |
| In(OH) <sub>3</sub> /C | 0.5 M K <sub>2</sub> SO <sub>4</sub>         | -1.1 V                         | ~5.4 <sup>[a]</sup>                   | 70% -77%                        | 7                |
| In nanoparticle        | 0.5 M K <sub>2</sub> SO <sub>4</sub>         | -0.85 V                        | ~2 <sup>[a]</sup>                     | ~100%                           | 8                |
| In nanocrystal         | Ion liquid (AN-BMIMPF <sub>6</sub> solution) | -1.9 V (SCE)                   | ~15                                   | ~99% (CO)                       | 9                |

<sup>[a]</sup> This value is derived from the graphical results in the article.



Table S4 Optimized adsorption configurations of \*H, \*COOH and \*OCHO on three facets of In.

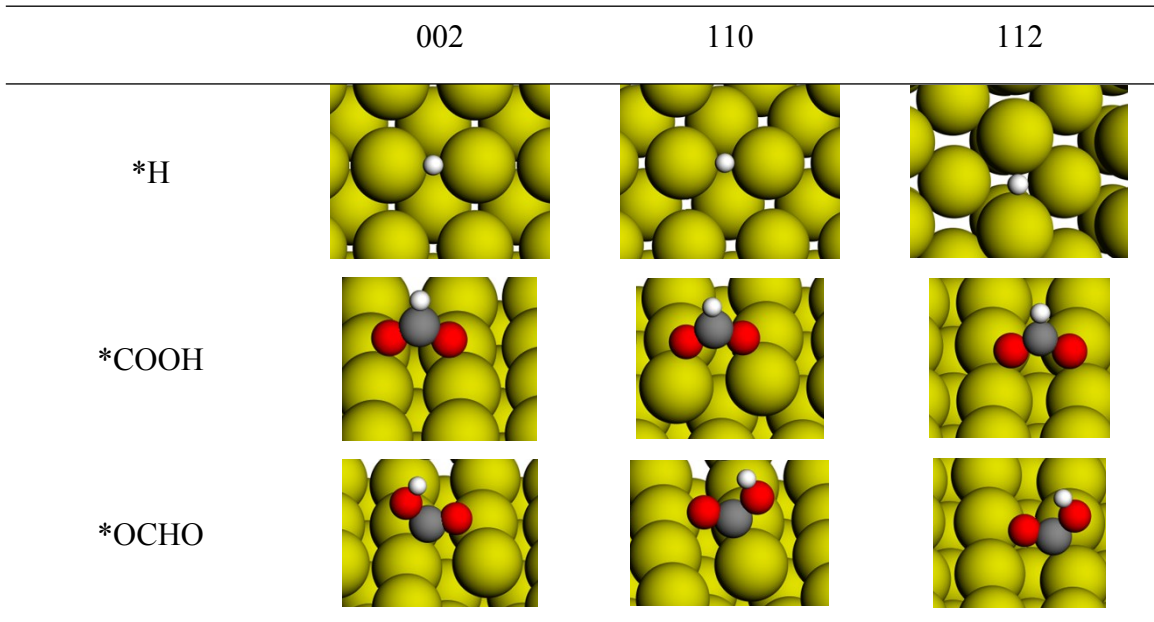

Table S5 The zero-point energy correction ( $E_{ZPE}$ ), enthalpy correction ( $\int C_v dT$ ), and entropy correction ( $-TS$ ) for adsorbates on three different structures. All values are given in eV.

| Structure | Adsorbates | $E_{ZPE}$ | $\int C_v dT$ | $-TS$ |
|-----------|------------|-----------|---------------|-------|
| In(101)   | *COOH      | 0.60      | 0.24          | -0.89 |
|           | *OCHO      | 0.59      | 0.23          | -0.94 |
| In(002)   | *COOH      | 0.59      | 0.24          | -0.88 |
|           | *OCHO      | 0.60      | 0.23          | -0.88 |
| In(110)   | *COOH      | 0.59      | 0.24          | -0.89 |
|           | *OCHO      | 0.59      | 0.21          | -0.83 |
| In(112)   | *COOH      | 0.59      | 0.24          | -0.89 |
|           | *OCHO      | 0.60      | 0.23          | -0.89 |

Table S6 The zero-point energy correction ( $E_{\text{ZPE}}$ ), enthalpy correction ( $\int C_v dT$ ), and entropy correction ( $-TS$ ) for free gaseous molecules with their partial pressure of 101325 Pa except for  $\text{H}_2\text{O}$  and  $\text{HCOOH}$ . In the case of  $\text{H}_2\text{O}$ , 3534 Pa was used and 2 Pa was used for  $\text{HCOOH}$ . Gas phase corrections were applied to  $\text{CO}_2$ ,  $\text{CO}$  and  $\text{HCOOH}$  with the value of 0.13, -0.54 and -0.1 eV, respectively.<sup>10</sup> All values are given in eV.

| Species              | $E_{\text{ZPE}}$ | $\int C_v dT$ | $-TS$ | $G - E_{\text{DFT}}$ |
|----------------------|------------------|---------------|-------|----------------------|
| $\text{CO}_2$        | 0.31             | 0.14          | -0.64 | -0.19                |
| $\text{CO}$          | 0.14             | 0.12          | -0.60 | -0.34                |
| $\text{H}_2\text{O}$ | 0.58             | 0.11          | -0.53 | 0.17                 |
| $\text{H}_2$         | 0.28             | 0.11          | -0.45 | -0.06                |
| $\text{HCOOH}$       | 0.90             | 0.18          | -0.69 | 0.39                 |

Table S7 Calculated DFT energies for HER.<sup>a</sup>

| Species          | $E_{\text{DFT}}$ |
|------------------|------------------|
| $\text{H}_2$ (g) | -6.81            |
| In(101)<br>H*    | -65.92<br>-68.64 |
| In(002)<br>H*    | -29.13<br>-31.89 |
| In(110)<br>H*    | -28.78<br>-31.54 |
| In(112)<br>H*    | -27.67<br>-30.51 |

<sup>a</sup> The HER free energy  $G_{\text{H}^*}$  is determined as  $G_{\text{H}^*} = E[\text{surf} + \text{H}] - E[\text{surf}] - E[\text{H}_2]/2 + \Delta E_{\text{ZPE}} - TS$ . Where  $E[\text{surf} + \text{H}]$  and  $E[\text{surf}]$  are the total energies of the surface with and without the H adsorbate, respectively.  $E[\text{H}_2]$  is the total energy of a hydrogen molecule.  $\Delta E_{\text{ZPE}}$  is the difference in the zero-point energy between the adsorbed H atom and the gaseous phase  $\text{H}_2$ .  $S$  is the difference in entropy. At  $T = 298$  K,  $G_{\text{H}^*}$  can be calculated by  $G_{\text{H}^*} = E[\text{surf} + \text{H}] - E[\text{surf}] - E[\text{H}_2]/2 + 0.24$  eV.<sup>10,11</sup>

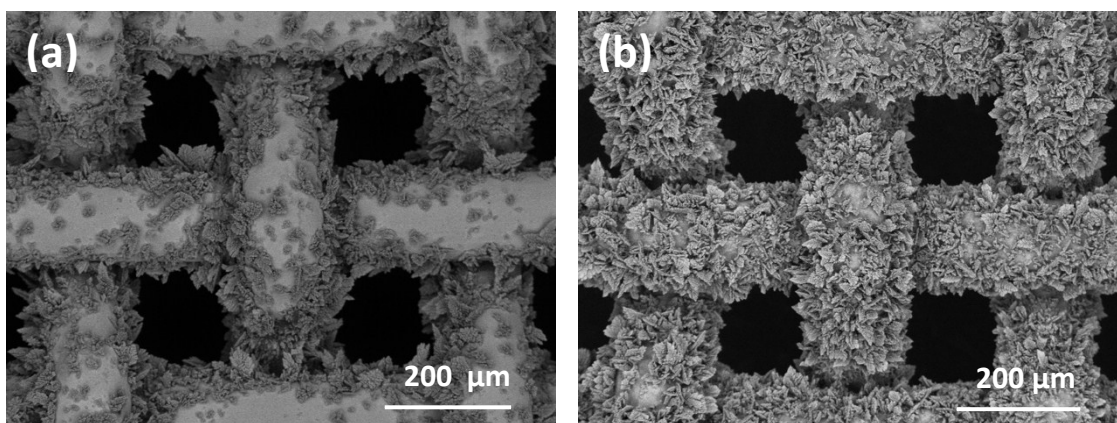

Figure S11 SEM images of as-prepared (a) *hp*-In-0.125 and (b) *hp*-In-0.5.

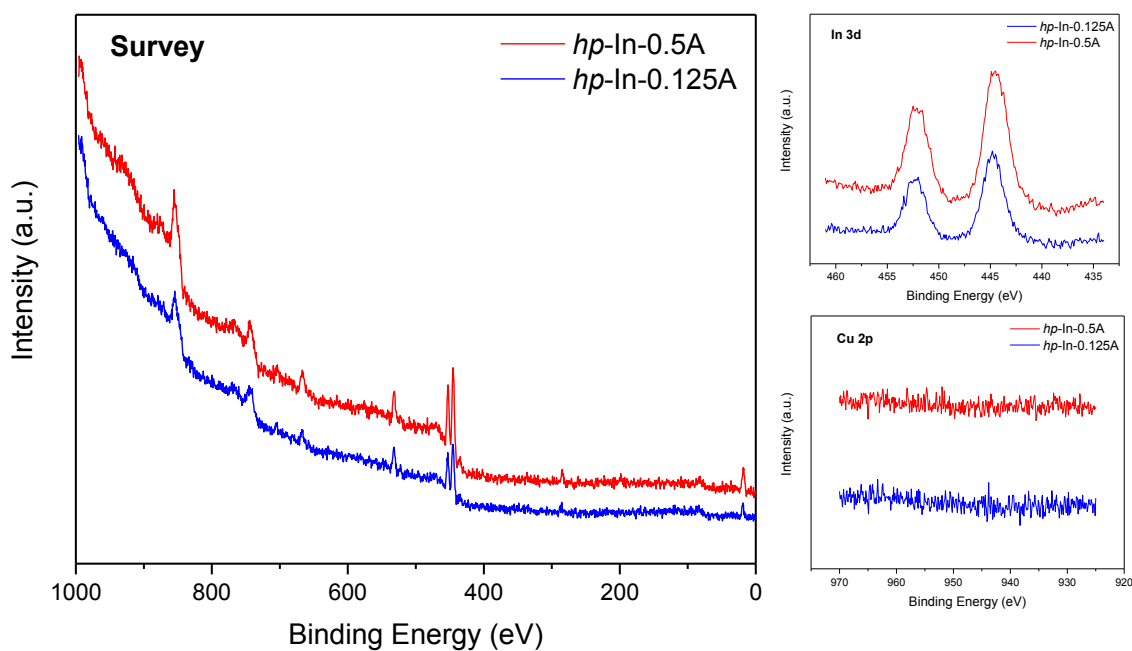

Figure S12 XPS survey, In 3d and Cu 2p spectra of as-prepared *hp*-In-0.125 and *hp*-In-0.5. Although the SEM images show that the porous In was not homogeneous deposited on these two samples at low current densities (Figure S10), XPS spectra indicate that the Cu mesh was fully covered by a layer of In.

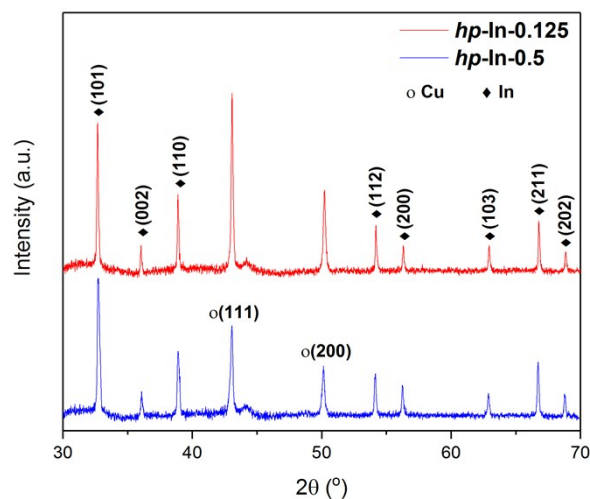

Figure S13 XRD patterns of as-prepared *hp*-In-0.125 and *hp*-In-0.5.

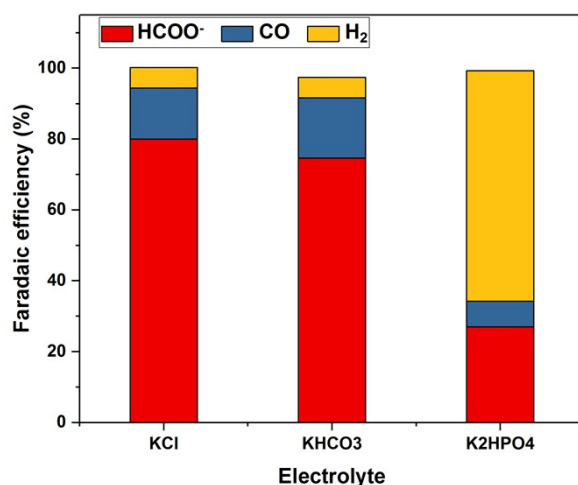

Figure S14 FEs of formate, CO and H<sub>2</sub> for *hp*-In measured in CO<sub>2</sub> saturated 0.1 M KCl, 0.1 M KHCO<sub>3</sub> and 0.1 M K<sub>2</sub>HPO<sub>4</sub> at 7 mA/cm<sup>2</sup>.

The local pH effect was further confirmed by performing CO<sub>2</sub>RR in three different electrolyte with different buffer abilities (i.e., 0.1 M K<sub>2</sub>HPO<sub>4</sub> > 0.1M KHCO<sub>3</sub> > 0.1M KClO<sub>4</sub>). Figure S14 shows the FE of H<sub>2</sub> significantly increased when K<sub>2</sub>HPO<sub>4</sub>, a strong buffer electrolyte, was used instead of KHCO<sub>3</sub>. In KCl electrolyte, the H<sub>2</sub> FE is similar as that in KHCO<sub>3</sub>. This may be because the local pH in KHCO<sub>3</sub> is already quite high that limits the H<sub>2</sub> FE to only 5.8 %. Thus, the results shown here confirm that the high local pH created near *hp*-In could suppress H<sub>2</sub> evolution and therefore increase the CO<sub>2</sub>RR FEs.

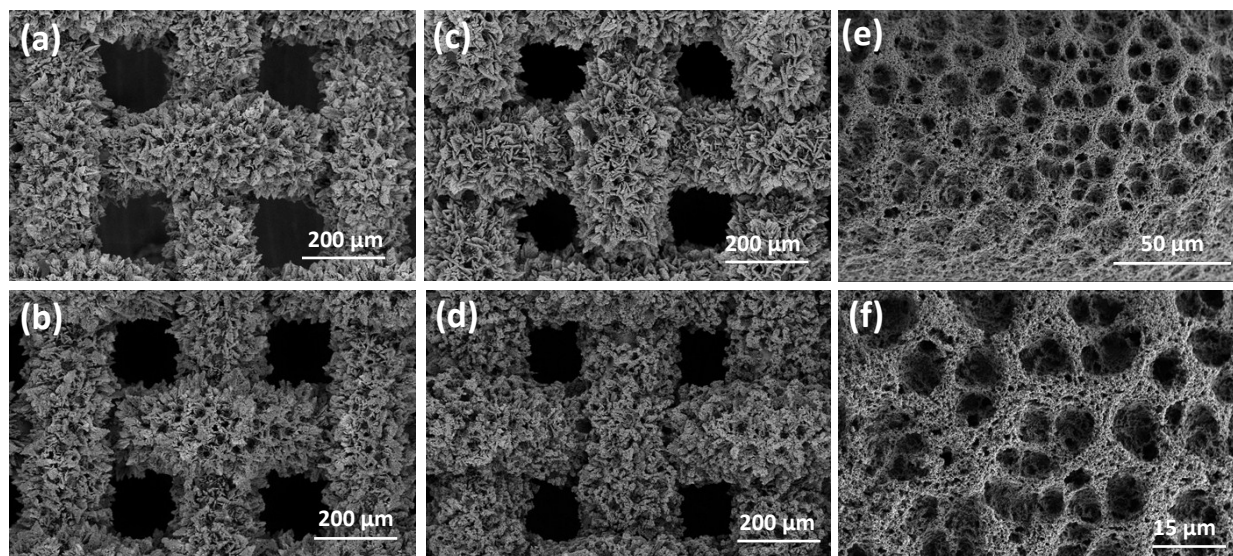

Figure S15 SEM images of Pd-In electrodes treated by different PdCl<sub>2</sub> solutions (a) 0.1 mM, (b) 0.5 mM, (c) 1.0 mM and (d) 2.0 mM, and porous Pd electrode with different magnifications (e) and (f).

## References:

- 1 M. Pourbaix, *Atlas of electrochemical equilibria in aqueous solutions*, National Association of Corrosion Engineers, Houston, Tex, 2nd edn., 1974.
- 2 Y.-H. Chung and C.-W. Lee, *J. Electrochem. Sci. Technol.*, 2012, **3**, 1–13.
- 3 Z. Bitar, A. Fecant, E. Trela-Baudot, S. Chardon-Noblat and D. Pasquier, *Appl. Catal. B Environ.*, 2016, **189**, 172–180.
- 4 R. Hegner, L. F. M. Rosa and F. Harnisch, *Appl. Catal. B Environ.*, 2018, **238**, 546–556.
- 5 Z. Xia, M. Freeman, D. Zhang, B. Yang, L. Lei, Z. Li and Y. Hou, *ChemElectroChem*, 2018, **5**, 253–259.
- 6 Z. M. Detweiler, J. L. White, S. L. Bernasek and A. B. Bocarsly, *Langmuir*, 2014, **30**, 7593–7600.
- 7 A. Rabiee and D. Nematollahi, *Mater. Chem. Phys.*, 2017, **193**, 109–116.
- 8 J. L. White and A. B. Bocarsly, *J. Electrochem. Soc.*, 2016, **163**, H410–H416.
- 9 C. Ding, A. Li, S. M. Lu, H. Zhang and C. Li, *ACS Catal.*, 2016, **6**, 6438–6443.
- 10 J. K. Nørskov, T. Bligaard, A. Logadottir, J. R. Kitchin, J. G. Chen, S. Pandalov and U. Stimming, *J. Electrochem. Soc.*, 2005, **152**, J23.
- 11 P. Wang, X. Zhang, J. Zhang, S. Wan, S. Guo, G. Lu, J. Yao and X. Huang, *Nat. Commun.*, 2017, **8**, 14580.
